# Supplementary material
Source: publisher figshare collection journal article supplement (https://acs.figshare.com/ndownloader/files/5355451)
Supplement: Supplementary file 1 [file 5355451]

## Supporting Information

### ***Graphene Oxide Membranes with Strong Stability in Aqueous Solutions and Controllable Lamellar Spacing***

*Yue-Heng Xi,<sup>†,§</sup> Jia-Qi Hu,<sup>†,§</sup> Zhuang Liu,<sup>\*,†</sup> Rui Xie,<sup>†</sup> Xiao-Jie Ju,<sup>†,‡</sup> Wei Wang,<sup>†</sup> and  
Liang-Yin Chu<sup>\*,†,‡,||</sup>*

<sup>†</sup>School of Chemical Engineering, Sichuan University, No. 24, Southern 1 Section, Yihuan Road, Chengdu, Sichuan 610065, P. R. China

<sup>‡</sup>State Key Laboratory of Polymer Materials Engineering, Sichuan University, Chengdu, Sichuan 610065, P. R. China

<sup>||</sup>Jiangsu National Synergetic Innovation Center for Advanced Materials (SICAM), Nanjing, Jiangsu 211816, P. R. China

<sup>§</sup> These authors contributed equally to this work.

#### ***Corresponding Authors***

E-mail: chuly@scu.edu.cn (L.-Y. Chu); liuz@scu.edu.cn (Z. Liu).

**Supplementary Figures 1-16**

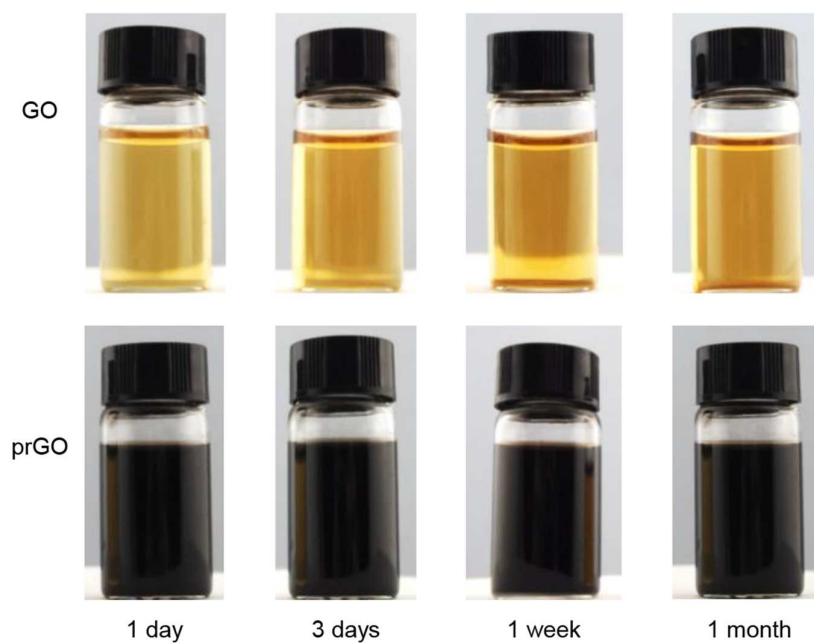

**Figure S1.** The as-prepared GO and prGO sheets are well dispersed in water for a long time.

The concentration of GO or prGO sheets is 0.1 mg/mL.

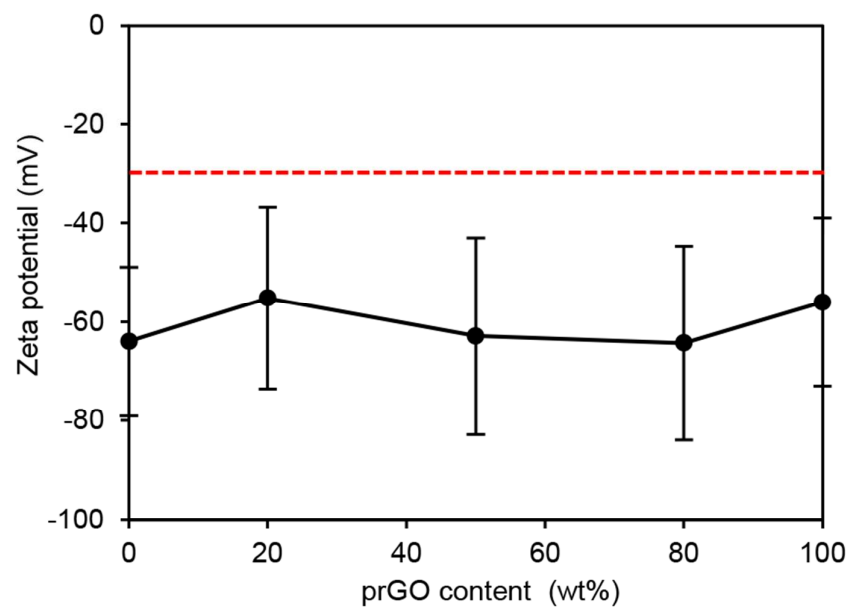

**Figure S2.** Effect of the prGO content on the zeta potential of the mixtures of GO dispersions.

Zeta potential under the red line represents the good stability of GO/prGO solution.

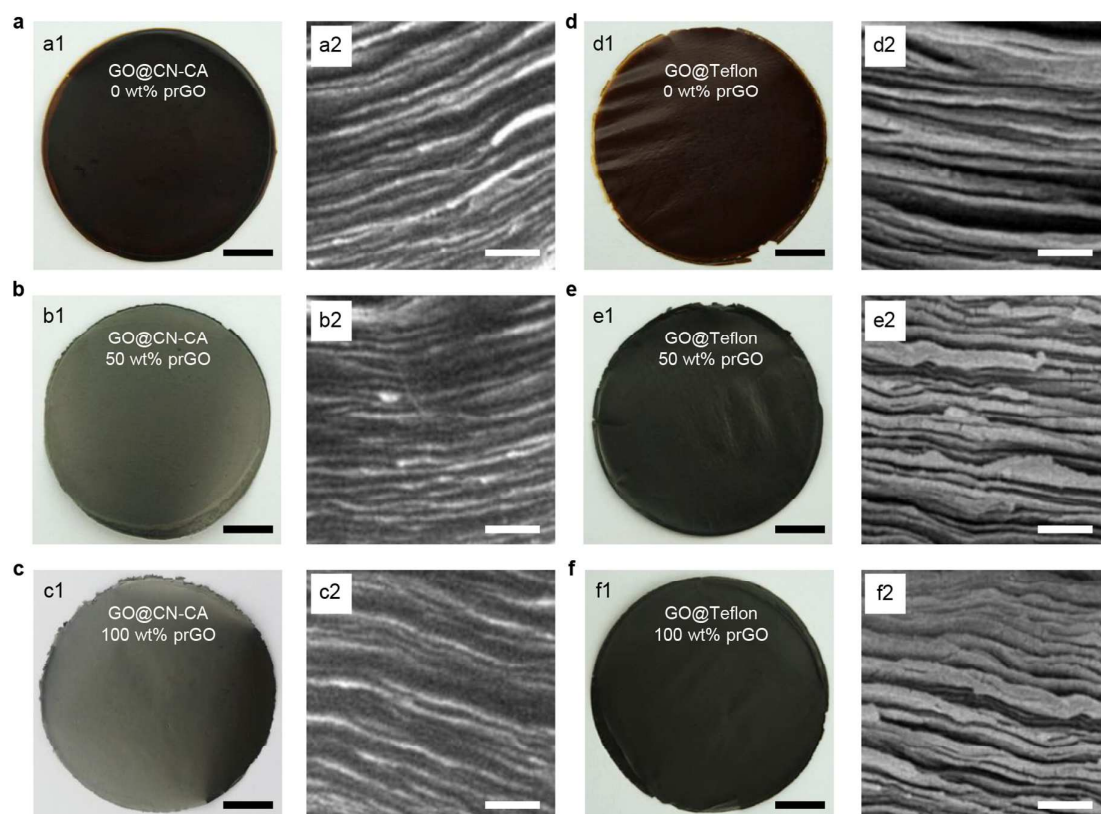

**Figure S3.** Photographs (a1, b1, c1, d1, e1 and f1) and cross-sectional SEM images (a2, b2, c2, d2, e2 and f2) of GO membranes with different contents of prGO that prepared with CN-CA (a-c) and Teflon (d-f) membranes as substrates. The scale bars are 10 mm in (a1, b1, c1, d1, e1 and f1); and 200 nm in (a2, b2, c2, d2, e2 and f2).

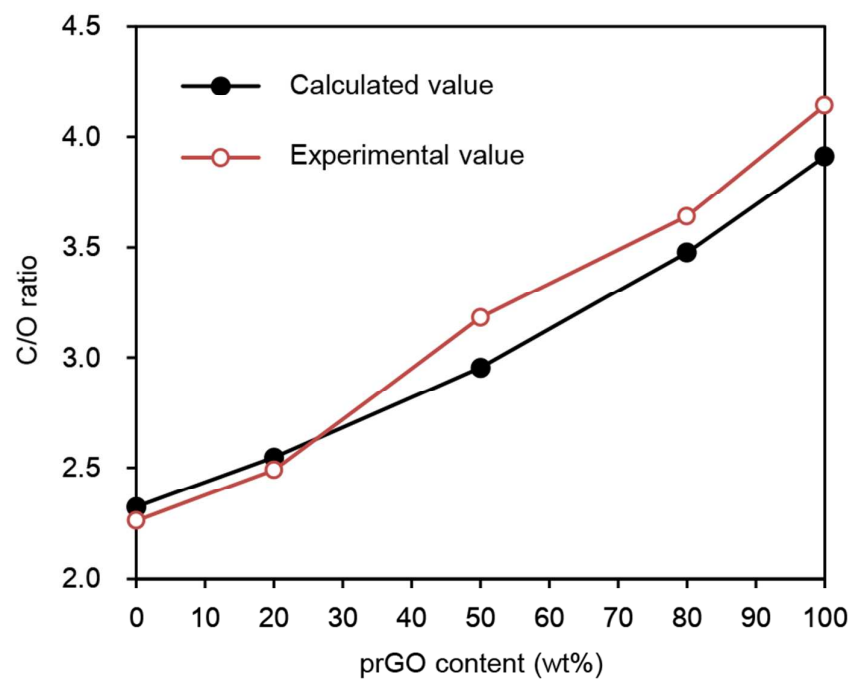

**Figure S4.** Effect of the prGO content on the C/O ratio of GO membranes.

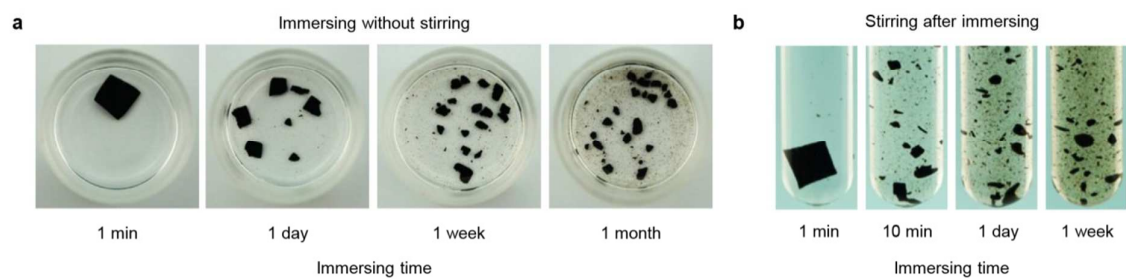

**Figure S5.** Stability of GO@CN-CA membranes without any prGO in ammonium hydroxide solution. (a) Statically immersing without stirring. (b) Stirring after statically immersing.

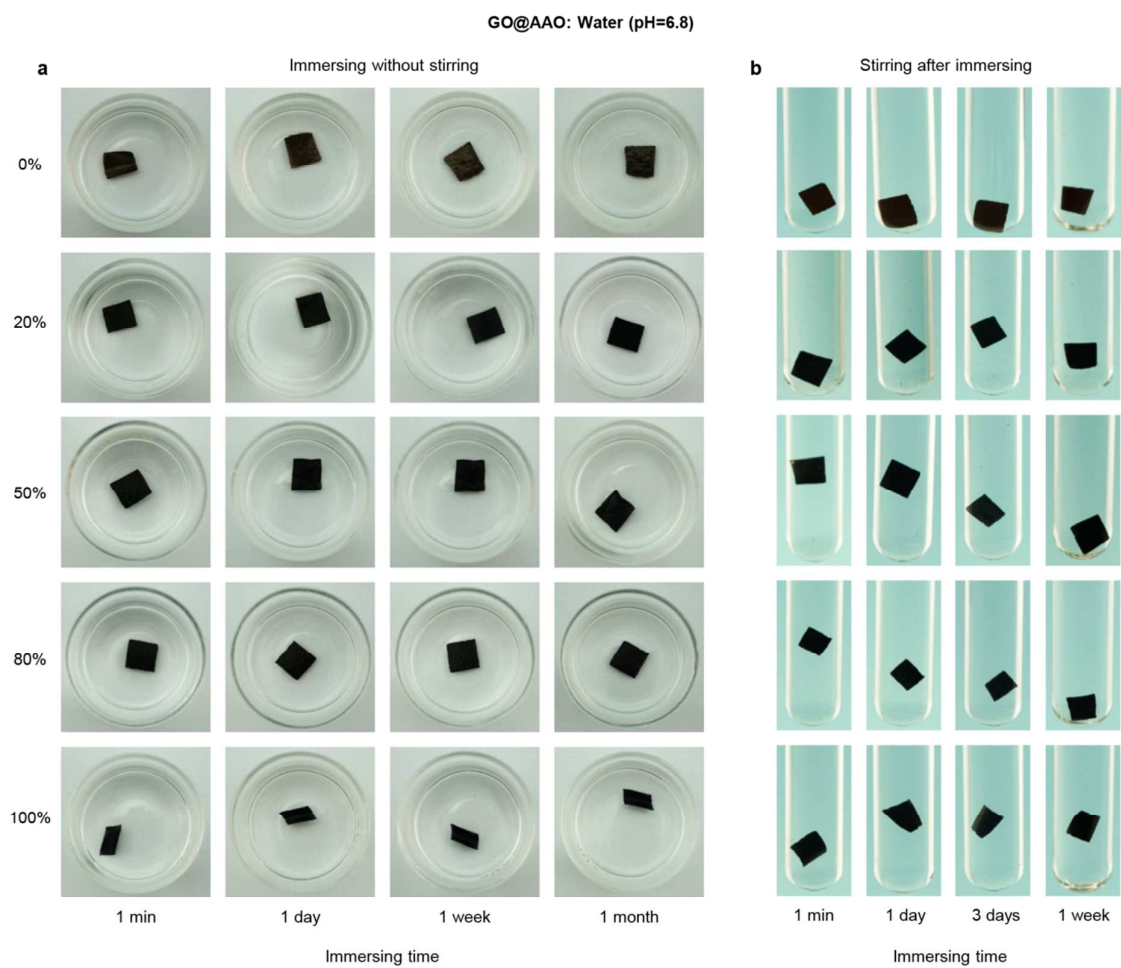

**Figure S6.** Stability of GO@AAO membranes with various contents of prGO in water at pH=6.8. (a) Statically immersing without stirring. (b) Stirring after statically immersing.

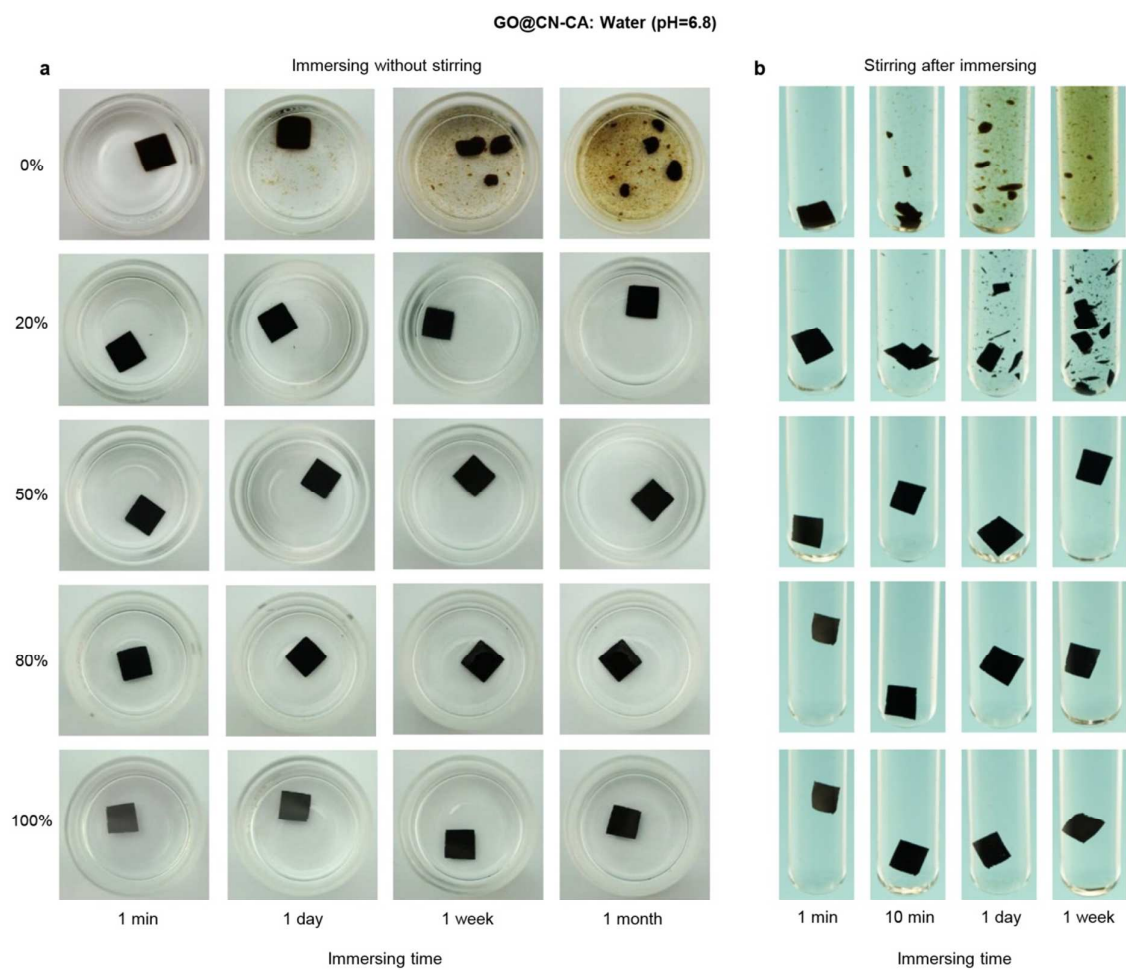

**Figure S7.** Stability of GO@CN-CA membranes with various contents of prGO in water at pH=6.8. (a) Statically immersing without stirring. (b) Stirring after statically immersing.



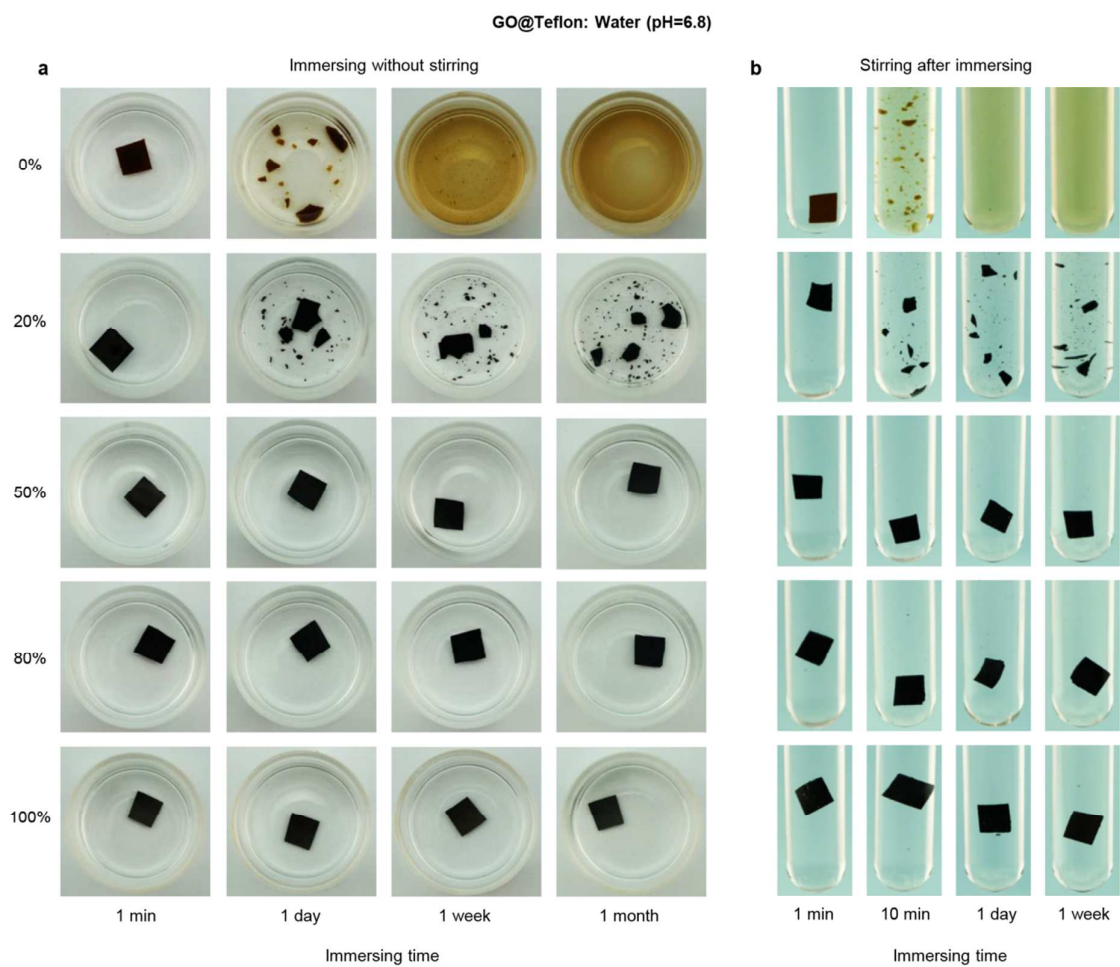

**Figure S8.** Stability of GO@Teflon membranes with various contents of prGO in water at pH=6.8. (a) Statically immersing without stirring. (b) Stirring after statically immersing.

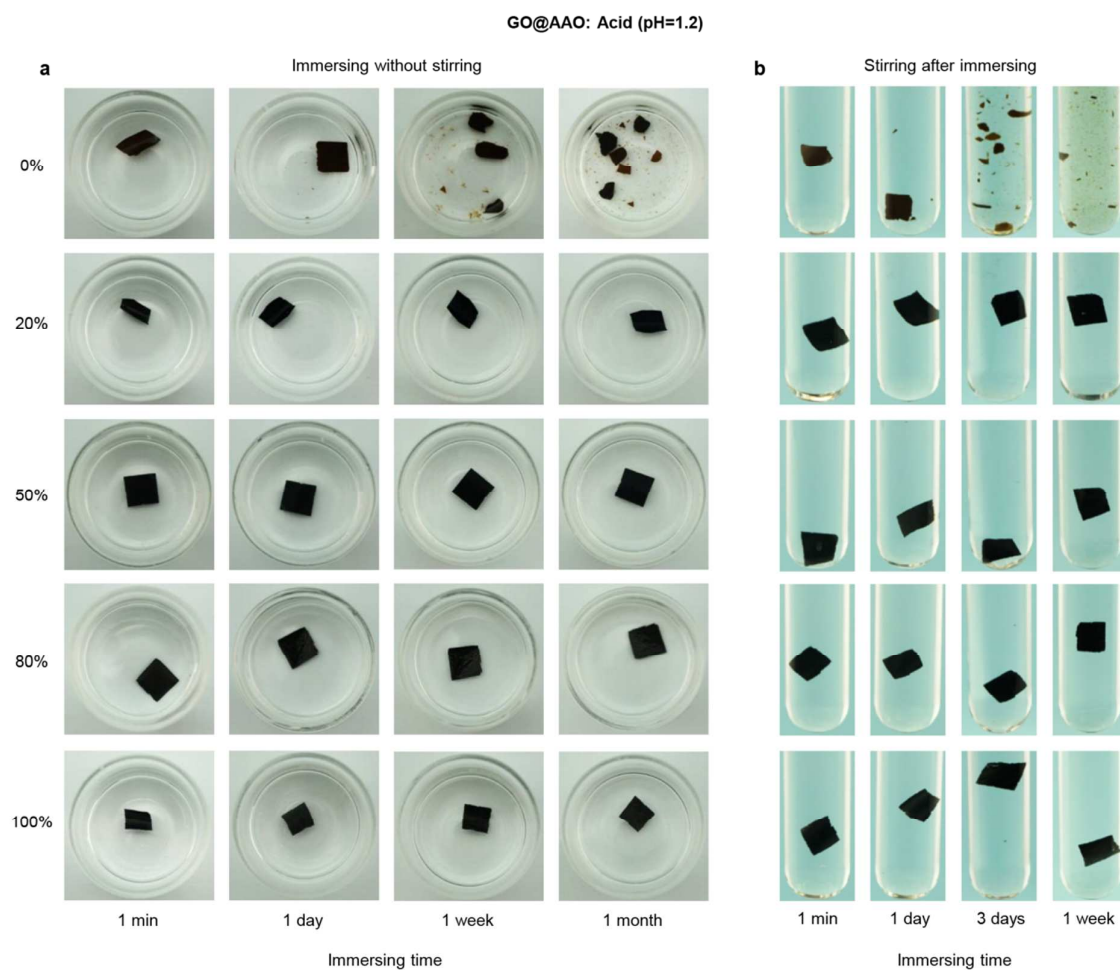

**Figure S9.** Stability of GO@AAO membranes with various contents of prGO in strong acid solution at pH=1.2. (a) Statically immersing without stirring. (b) Stirring after statically immersing.

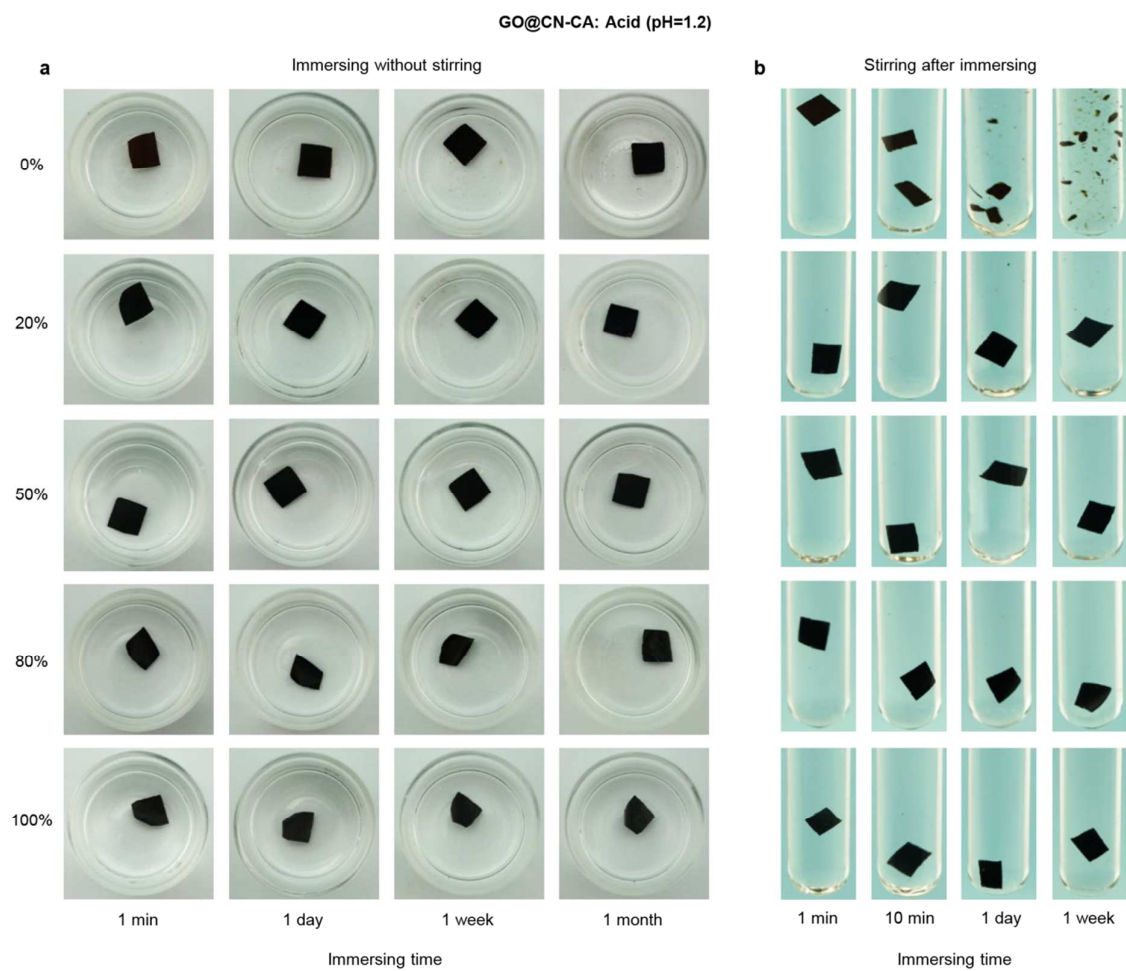

**Figure S10.** Stability of GO@CN-CA membranes with various contents of prGO in strong acid solution at pH=1.2. (a) Statically immersing without stirring. (b) Stirring after statically immersing.

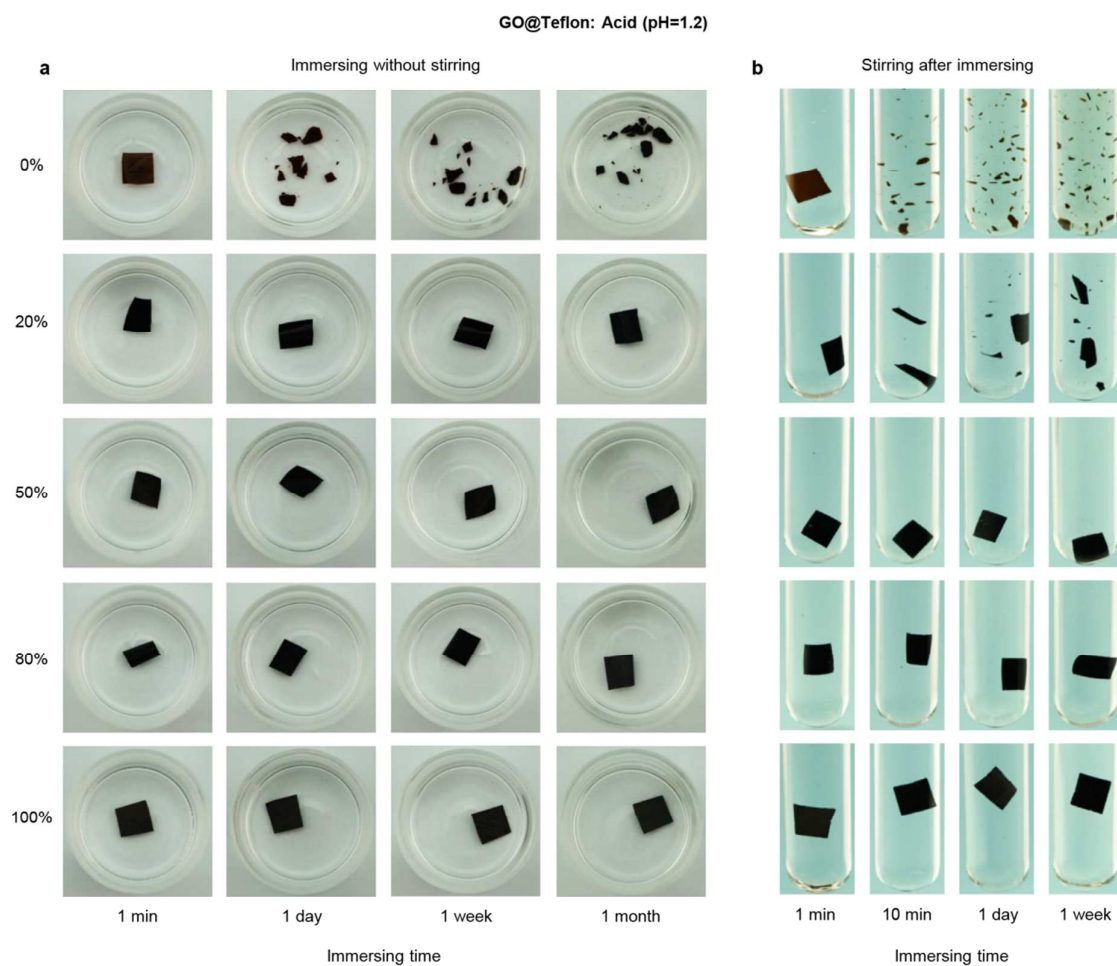

**Figure S11.** Stability of GO@Teflon membranes with various contents of prGO in strong acid solution at pH=1.2. (a) Statically immersing without stirring. (b) Stirring after statically immersing.

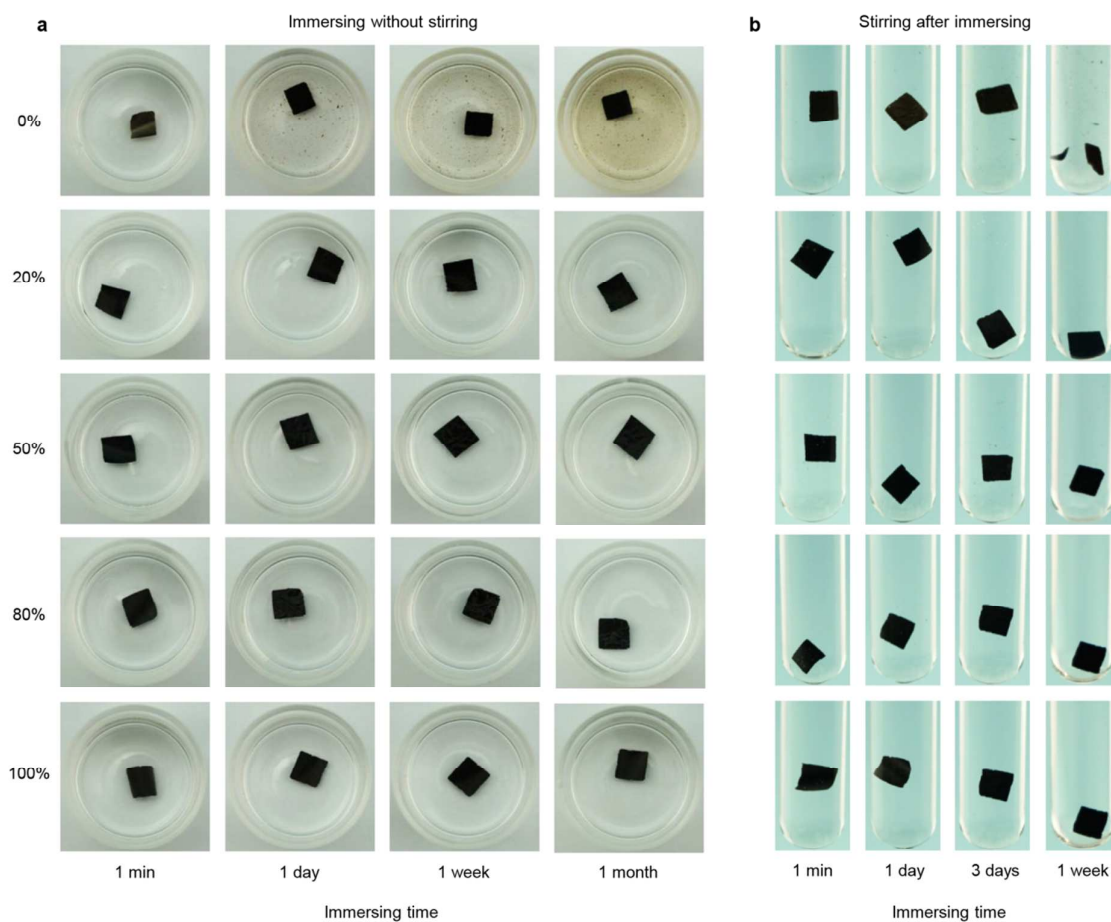

**Figure S12.** Stability of GO@AAO membranes with various contents of prGO in base solution at pH=10.8. (a) Statically immersing without stirring. (b) Stirring after statically immersing.



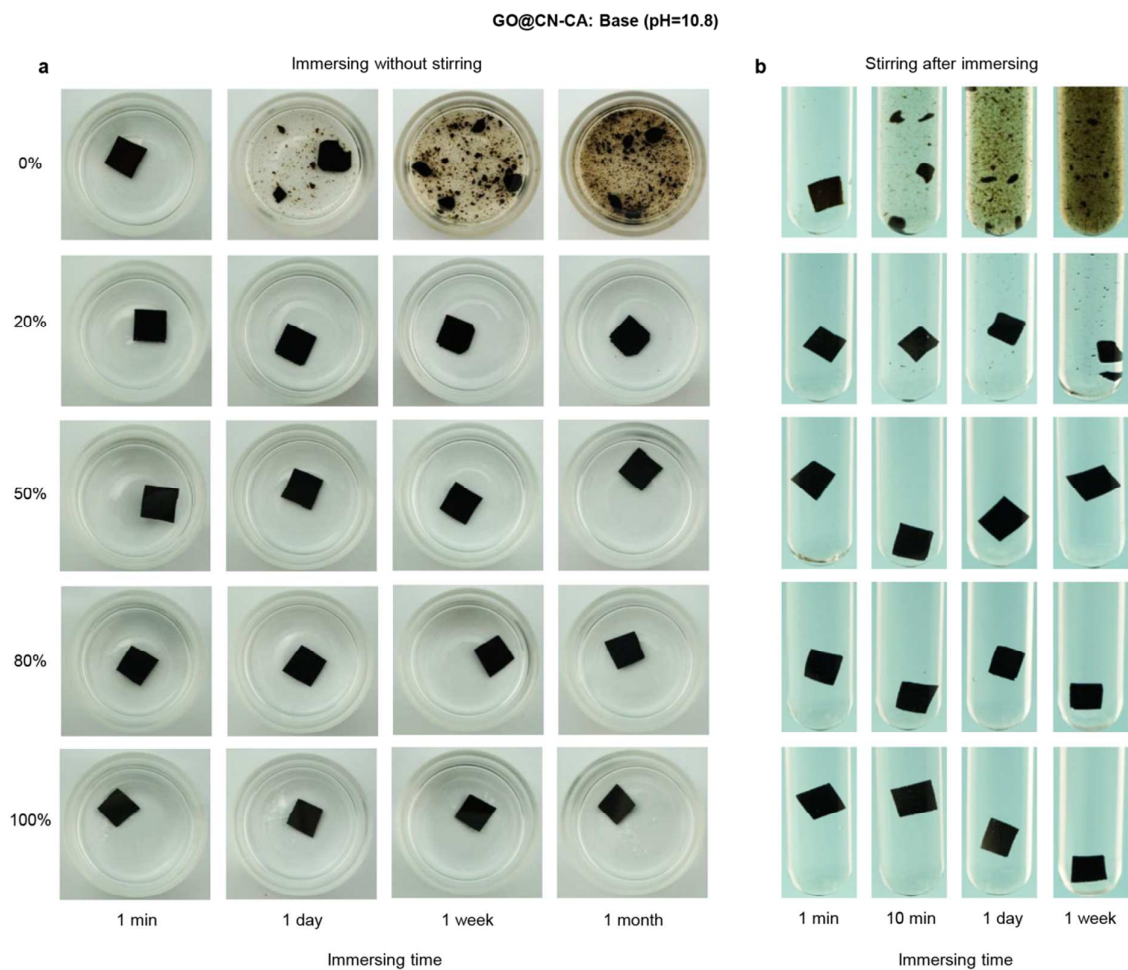

**Figure S13.** Stability of GO@CN-CA membranes with various contents of prGO in base solution at pH=10.8. (a) Statically immersing without stirring. (b) Stirring after statically immersing.

GO@Teflon: Base (pH=10.8)

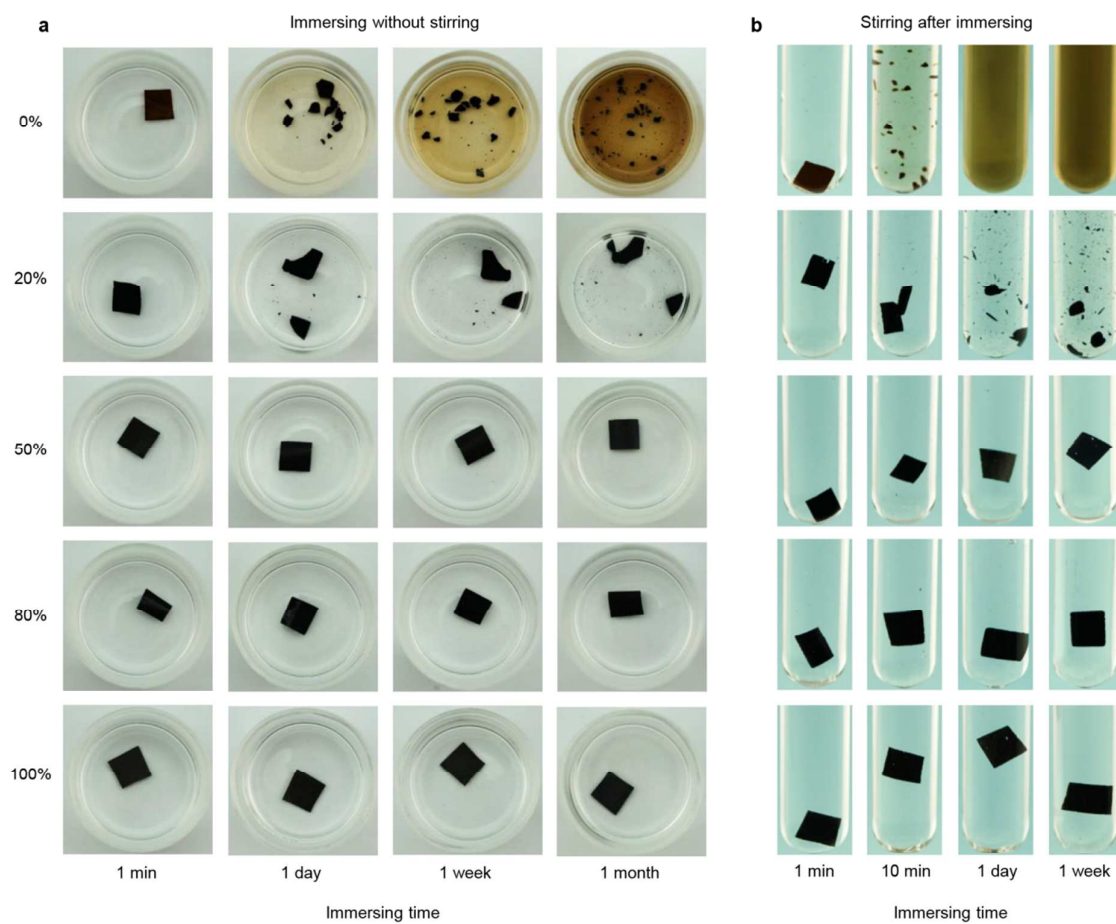

**Figure S14.** Stability of GO@Teflon membranes with various contents of prGO in base solution at pH=10.8. (a) Statically immersing without stirring. (b) Stirring after statically immersing.

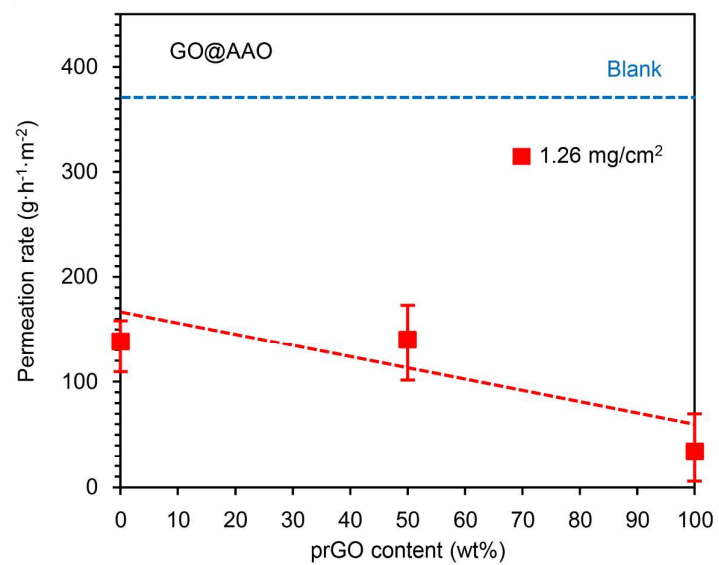

**Figure S15.** Effect of the prGO content on the water permeation rate of GO@AAO membranes with various contents of prGO.



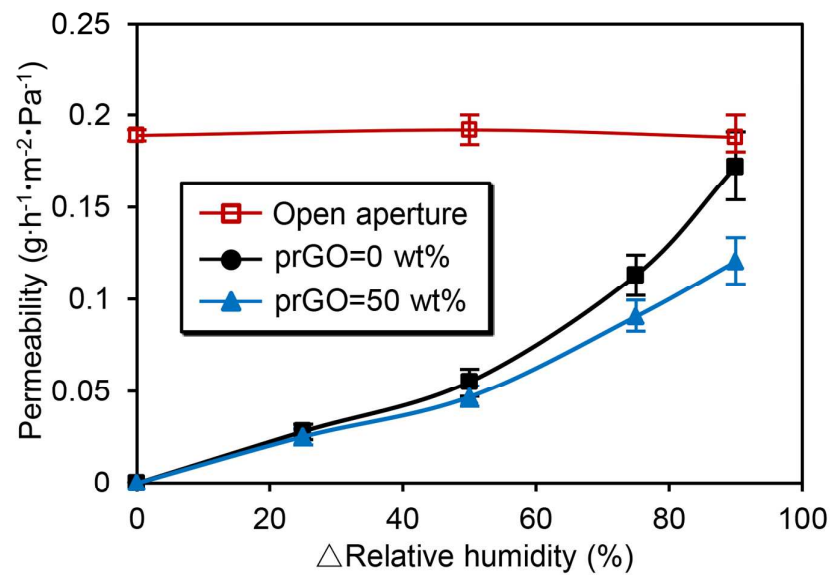

**Figure S16.** Water permeability values with different relative humidities through an open aperture and the same aperture covered with GO membranes with different prGO contents. “ $\Delta$ Relative humidity ( $\Delta$ RH)” is the difference of relative humidity between inside and outside the membrane device.

## **Captions for Supplementary Movies 1-9**

**Supplementary Movie 1.** Stability of GO@AAO membranes with 0 wt% and 50 wt% prGO in water under stirring operation after being soaked for certain time periods.

**Supplementary Movie 2.** Stability of GO@AAO membranes with 0 wt% and 50 wt% prGO in acid solution under stirring operation after being soaked for certain time periods.

**Supplementary Movie 3.** Stability of GO@AAO membranes with 0 wt% and 50 wt% prGO in base solution under stirring operation after being soaked for certain time periods.

**Supplementary Movie 4.** Stability of GO@CN-CA membranes with 0 wt% and 50 wt% prGO in water under stirring operation after being soaked for certain time periods.

**Supplementary Movie 5.** Stability of GO@Teflon membranes with 0 wt% and 50 wt% prGO in water under stirring operation after being soaked for certain time periods.

**Supplementary Movie 6.** Stability of GO@CN-CA membranes with 0 wt% and 50 wt% prGO in acid solution under stirring operation after being soaked for certain time periods.

**Supplementary Movie 7.** Stability of GO@CN-CA membranes with 0 wt% and 50 wt% prGO in base solution under stirring operation after being soaked for certain time periods.

**Supplementary Movie 8.** Stability of GO@Teflon membranes with 0 wt% and 50 wt% prGO in acid solution under stirring operation after being soaked for certain time periods.

**Supplementary Movie 9.** Stability of GO@Teflon membranes with 0 wt% and 50 wt% prGO in base solution under stirring operation after being soaked for certain time periods.
